# Supplementary material for: Understanding the regioselectivity of Michael addition reactions to asymmetric divinylic compounds
Source: Royal Society of Chemistry journal article supplement (doi:10.1039/c7ra11005g), 2017-01-01
Supplement: c7ra11005g1.pdf [file c7ra11005g1.pdf]

**Understanding the regioselectivity of Michael addition  
reaction to asymmetric divinyllic compounds.**

**SUPPORTING INFORMATION**

## Associated content

Reference Cartesian coordinates for all studied non-symmetric crosslinkers and N,N-diethylamine and the relative energy of conformers.

p. 3 Table SI-1 Relative energy of conformers of asymmetric crosslinkers

p. 4 Table SI-2 Reference Cartesian coordinates for **AOEMA**

p. 6 Table SI-3 Reference Cartesian coordinates for **AAEA**

p. 7 Table SI-4 Reference Cartesian coordinates for **AAEMA**

p. 9 Table SI-5 Reference Cartesian coordinates for **AVP**

p. 11 Table SI-6 Reference Cartesian coordinates for **MAEA**

p. 13 Table SI-6 Reference Cartesian Coordinates and global reactivity parameters for **N,N-diethylamine**

Table 1: Relative energy of conformers of asymmetric crosslinkers.

| Conformer    | Subunit 1        | Subunit 2          | Relative Energy (Kcal/mol) |
|--------------|------------------|--------------------|----------------------------|
| <b>AOEMA</b> |                  |                    |                            |
| 1            | Trans-Acrylate   | Trans-Methacrylate | 0.29                       |
| 2            | Cis-Acrylate     | Trans-Methacrylate | 0.00                       |
| 3            | Trans-Acrylate   | Cis-Methacrylate   | 0.65                       |
| 4            | Cis-Acrylate     | Cis-Methacrylate   | 0.37                       |
| <b>AAEA</b>  |                  |                    |                            |
| 1            | Trans-Acrylate   | Trans-Acrylamide   | 1.55                       |
| 2            | Cis-Acrylate     | Trans-Acrylamide   | 1.07                       |
| 3            | Trans-Acrylate   | Cis-Acrylamide     | 0.39                       |
| 4            | Cis-Acrylate     | Cis-Acrylamide     | 0.00                       |
| <b>AAEMA</b> |                  |                    |                            |
| 1            | Trans-Acrylamide | Trans-Methacrylate | 1.29                       |
| 2            | Cis-Acrylamide   | Trans-Methacrylate | 0.00                       |
| 3            | Trans-Acrylamide | Cis-Methacrylate   | 1.59                       |
| 4            | Cis-Acrylamide   | Cis-Methacrylate   | 0.35                       |
| <b>AVP</b>   |                  |                    |                            |
| 1            | Trans-acrylate   | Trans-VP           | 0.33                       |
| 2            | Cis-acrylate     | Trans-VP           | 0.00                       |
| 3            | Trans-acrylate   | Cis-VP             | 3.50                       |
| 4            | Cis-acrylate     | Cis-VP             | 3.17                       |
|              |                  |                    |                            |

| MAEA |                      |                |      |
|------|----------------------|----------------|------|
| 1    | Trans-methacrylamide | Trans-acrylate | 0.29 |
| 2    | Cis-methacrylamide   | Trans-acrylate | 0.92 |
| 3    | Trans-methacrylamide | Cis-acrylate   | 0.00 |
| 4    | Cis-methacrylamide   | Cis-acrylate   | 0.56 |

**AOEMA: 2-(AcryloylOxy)-Ethyl-MethAcrylate**

|   |          |          |          |
|---|----------|----------|----------|
| C | -5.70150 | -0.23225 | -0.00056 |
| C | -4.44959 | -0.69367 | 0.00032  |
| C | -3.29964 | 0.24416  | 0.00000  |
| O | -3.36576 | 1.45609  | -0.00104 |
| O | -2.12648 | -0.43937 | 0.00088  |
| C | -0.93933 | 0.37119  | 0.00052  |
| C | 0.22845  | -0.59819 | 0.00051  |
| O | 1.41367  | 0.21419  | 0.00032  |
| C | 2.58671  | -0.46792 | -0.00034 |
| C | 3.79169  | 0.41490  | -0.00011 |
| O | 2.64103  | -1.68192 | -0.00047 |
| C | 5.10649  | -0.31802 | -0.00064 |
| C | 3.67667  | 1.74882  | 0.00057  |
| H | -6.55563 | -0.90111 | -0.00035 |
| H | -5.88990 | 0.83698  | -0.00151 |
| H | -4.21930 | -1.75430 | 0.00128  |
| H | -0.92575 | 1.01505  | 0.88479  |

|   |          |          |          |
|---|----------|----------|----------|
| H | -0.92604 | 1.01475  | -0.88395 |
| H | 0.21408  | -1.24201 | -0.88366 |
| H | 0.21424  | -1.24183 | 0.88482  |
| H | 5.18994  | -0.96941 | 0.87521  |
| H | 5.94350  | 0.38378  | -0.00047 |
| H | 5.18966  | -0.96866 | -0.87706 |
| H | 2.70903  | 2.23576  | 0.00097  |
| H | 4.55684  | 2.38494  | 0.00075  |

B3LYP/6-31G(d,p) Energy: 38.2182 KJ/mol

**AAEA: 2-(Acrylamidoethyl)-Acrylate**

|   |          |          |          |
|---|----------|----------|----------|
| C | -5.18777 | -0.28453 | 0.33562  |
| C | -4.01542 | 0.34256  | 0.44540  |
| C | -2.78145 | -0.25512 | -0.12467 |
| O | -2.71168 | -1.31156 | -0.71926 |
| O | -1.71321 | 0.54747  | 0.10520  |
| C | -0.44895 | 0.06335  | -0.38589 |
| C | 0.56846  | 1.17765  | -0.14798 |
| N | 1.89217  | 0.80787  | -0.61771 |
| C | 2.77133  | 0.11714  | 0.17840  |
| O | 2.49528  | -0.20206 | 1.33082  |
| C | 4.08160  | -0.19684 | -0.46801 |
| C | 5.02289  | -0.86538 | 0.19856  |
| H | -6.09986 | 0.13458  | 0.74736  |
| H | -5.24987 | -1.24083 | -0.17477 |
| H | -3.91095 | 1.29792  | 0.94990  |
| H | -0.53935 | -0.18837 | -1.44734 |
| H | -0.16275 | -0.84174 | 0.15707  |
| H | 0.63723  | 1.38352  | 0.92245  |
| H | 0.24848  | 2.09193  | -0.65690 |
| H | 2.14090  | 0.99902  | -1.57626 |
| H | 4.24655  | 0.13360  | -1.49220 |
| H | 4.83475  | -1.18368 | 1.21938  |
| H | 5.98248  | -1.10490 | -0.24739 |

B3LYP/6-31G(d,p) Energy: -63.042 KJ/mol

**AAEMA: 2-(Acrylamido)ethyl methacrylate**

|   |          |          |          |
|---|----------|----------|----------|
| C | -3.80757 | 1.51612  | 0.39071  |
| C | -3.71767 | 0.19384  | 0.20229  |
| C | -2.40664 | -0.46207 | -0.08949 |
| O | -2.27714 | -1.66063 | -0.24739 |
| O | -1.37045 | 0.40733  | -0.16573 |
| C | -0.08171 | -0.17950 | -0.42452 |
| C | 0.90090  | 0.97898  | -0.58490 |
| N | 2.24506  | 0.51005  | -0.87250 |
| C | 3.12247  | 0.18040  | 0.13036  |
| O | 2.82873  | 0.29071  | 1.31680  |
| C | 4.45404  | -0.30554 | -0.34285 |
| C | 5.39377  | -0.66546 | 0.53165  |
| C | -4.89009 | -0.74799 | 0.26766  |
| H | -5.81372 | -0.20638 | 0.48428  |
| H | -4.73543 | -1.50851 | 1.03973  |
| H | -5.00929 | -1.28884 | -0.67673 |
| H | -2.93566 | 2.15699  | 0.33891  |
| H | -4.76283 | 1.98615  | 0.60523  |
| H | 0.21072  | -0.81961 | 0.41245  |
| H | -0.13385 | -0.79802 | -1.32624 |
| H | 0.57077  | 1.64123  | -1.39109 |
| H | 0.93853  | 1.55443  | 0.34265  |
| H | 2.50834  | 0.34279  | -1.83170 |
| H | 4.63567  | -0.35747 | -1.41506 |

|   |         |          |         |
|---|---------|----------|---------|
| H | 5.18886 | -0.60437 | 1.59611 |
|---|---------|----------|---------|

|   |         |          |         |
|---|---------|----------|---------|
| H | 6.36841 | -1.02080 | 0.21407 |
|---|---------|----------|---------|

B3LYP/6-31G(d,p) Energy: -52.4655 KJ/mol



**AVP: 3-(2-(acryloyloxy)ethyl)-N-Vinyl-2-pyrrolidone**

|   |          |          |          |
|---|----------|----------|----------|
| C | -2.44512 | 1.86699  | -0.39203 |
| C | -1.43531 | 0.72170  | -0.58966 |
| C | -3.81940 | 1.17163  | -0.37469 |
| N | -3.50681 | -0.17515 | 0.09494  |
| C | -2.15927 | -0.48814 | 0.01019  |
| C | -0.04307 | 0.97505  | 0.00352  |
| C | 0.98672  | -0.06103 | -0.42699 |
| O | 2.24724  | 0.33572  | 0.15706  |
| C | 3.33513  | -0.34500 | -0.26879 |
| C | 4.60651  | 0.08912  | 0.38989  |
| C | 4.61332  | 1.03982  | 1.33208  |
| C | 5.83904  | -0.62995 | -0.08912 |
| O | 3.28669  | -1.22250 | -1.10973 |
| C | -4.46105 | -1.10574 | 0.50033  |
| C | -5.78328 | -0.90537 | 0.51674  |
| O | -1.66818 | -1.55399 | 0.34502  |
| H | -2.37973 | 2.63566  | -1.16554 |
| H | -2.26518 | 2.34979  | 0.57503  |
| H | -1.33272 | 0.51054  | -1.66556 |
| H | -4.28119 | 1.13173  | -1.37092 |
| H | -4.52925 | 1.65549  | 0.30363  |
| H | -0.10682 | 0.99378  | 1.09788  |
| H | 0.30274  | 1.96663  | -0.31306 |
| H | 1.09323  | -0.09679 | -1.51624 |

|   |          |          |          |
|---|----------|----------|----------|
| H | 0.71832  | -1.06081 | -0.08003 |
| H | 3.70013  | 1.52873  | 1.64933  |
| H | 5.53916  | 1.34776  | 1.80924  |
| H | 5.74576  | -1.70903 | 0.06970  |
| H | 6.72877  | -0.27034 | 0.43302  |
| H | 5.97881  | -0.48949 | -1.16590 |
| H | -4.00852 | -2.04190 | 0.81056  |
| H | -6.24695 | 0.02197  | 0.19913  |
| H | -6.44015 | -1.69599 | 0.85745  |

B3LYP/6-31G(d,p) Energy: 30.8446 KJ/mol

**MAEA: 2-(Methacrylamido)ethyl acrylate**

|   |          |          |          |
|---|----------|----------|----------|
| C | -4.92262 | -0.54021 | -0.49408 |
| C | -3.75828 | 0.32644  | -0.09858 |
| C | -2.42928 | -0.38527 | -0.07232 |
| C | -3.85460 | 1.64183  | 0.13080  |
| O | -2.19120 | -1.32326 | -0.82764 |
| N | -1.51604 | 0.07034  | 0.84311  |
| C | -0.19442 | -0.52076 | 0.96442  |
| C | 0.84713  | 0.26583  | 0.17171  |
| O | 2.11026  | -0.39262 | 0.38212  |
| C | 3.19368  | 0.22746  | -0.14711 |
| O | 3.13571  | 1.27741  | -0.75437 |
| C | 4.42696  | -0.55300 | 0.12596  |
| C | 5.61317  | -0.12250 | -0.30675 |
| H | -5.09866 | -1.32626 | 0.24965  |
| H | -4.69935 | -1.04835 | -1.43643 |
| H | -5.83697 | 0.04725  | -0.60413 |
| H | -4.80842 | 2.15736  | 0.06734  |
| H | -2.98746 | 2.25809  | 0.34906  |
| H | -1.81001 | 0.76471  | 1.51185  |
| H | -0.25072 | -1.54297 | 0.58357  |
| H | 0.09275  | -0.55845 | 2.01997  |
| H | 0.91544  | 1.30594  | 0.50590  |
| H | 0.60427  | 0.26830  | -0.89504 |
| H | 4.31049  | -1.47653 | 0.68423  |
| H | 5.68698  | 0.80638  | -0.86406 |

H 6.52537 -0.67899 -0.11889

B3LYP/6-31G(d,p) Energy: -11.8106 KJ/mol

### N,N-Diethylamine

|   |          |          |          |
|---|----------|----------|----------|
| N | -0.01657 | -0.87409 | -0.44798 |
| C | -1.32429 | -0.52826 | 0.11448  |
| C | -1.65618 | 0.96070  | 0.00596  |
| C | 1.15133  | -0.49687 | 0.36153  |
| C | 1.83628  | 0.78175  | -0.13055 |
| H | 0.00288  | -1.87609 | -0.60423 |
| H | -1.41991 | -0.83777 | 1.17363  |
| H | -2.07521 | -1.09737 | -0.44657 |
| H | -0.99369 | 1.57036  | 0.62799  |
| H | -2.68237 | 1.14687  | 0.34071  |
| H | -1.55813 | 1.29946  | -1.02966 |
| H | 1.87887  | -1.31628 | 0.31349  |
| H | 0.88259  | -0.38941 | 1.42743  |
| H | 2.14235  | 0.66881  | -1.17479 |
| H | 2.72601  | 0.99966  | 0.47149  |
| H | 1.16980  | 1.64644  | -0.07218 |

B3LYP/6-31G(d,p) Energy: -10.1493 KJ/mol

| Compound Name | $E_{\text{HOMO}}$<br>(eV) | $E_{\text{LUMO}}$<br>(eV) | $\mu=(\varepsilon_{\text{H}}+\varepsilon_{\text{L}})/2$ | $\eta=\varepsilon_{\text{L}}-\varepsilon_{\text{H}}$ | $\varpi=\mu^2/2\eta$ | $\Delta N_{\text{max}}$ |
|---------------|---------------------------|---------------------------|---------------------------------------------------------|------------------------------------------------------|----------------------|-------------------------|
| Diethylamine  | -5.820                    | 2.219                     | -3.60                                                   | 8.04                                                 | 0.80                 | 0.45                    |
